# Supplementary material for: Time evolution of entanglement of electrons and nuclei and partial traces in ultrafast photochemistry
Source: Royal Society of Chemistry journal article supplement (doi:10.1039/d2cp01440h), 2022-01-01
Supplement: d2cp01440h1.pdf [file d2cp01440h1.pdf]

## Electronic Supplementary Materials

### Time Evolution of Entanglement of Electrons and Nuclei and Partial Traces in Ultrafast Photochemistry

Martin Blavier,<sup>1,2</sup> R. D. Levine,<sup>2,3</sup> F. Remacle<sup>1,2\*</sup>

<sup>1</sup>Theoretical Physical Chemistry, University of Liège, 4000 Liège, Belgium

<sup>2</sup>The Fritz Haber Research Center for Molecular Dynamics, The Hebrew University of  
Jerusalem, 91904 Jerusalem, Israel

<sup>3</sup> Department of Chemistry and Biochemistry and Department of Molecular and Medical  
Pharmacology, David Geffen School of Medicine, University of California, Los Angeles, CA  
90095, USA

#### Supplementary Figures

Figure S1: Curves of the non adiabatic coupling between the electronic states

Figure S2: Curves of the transition dipoles

Figure S3: Zoom on the time behavior of the singular values  $\sigma_4$ ,  $\sigma_5$  and  $\sigma_6$ .

Figure S4: Recovered population in the  $\Sigma_3$  electronic state and associated coherences  $\Sigma_3$ - $\Sigma_4$  and  
 $\Sigma_3$ - $\Sigma_2$

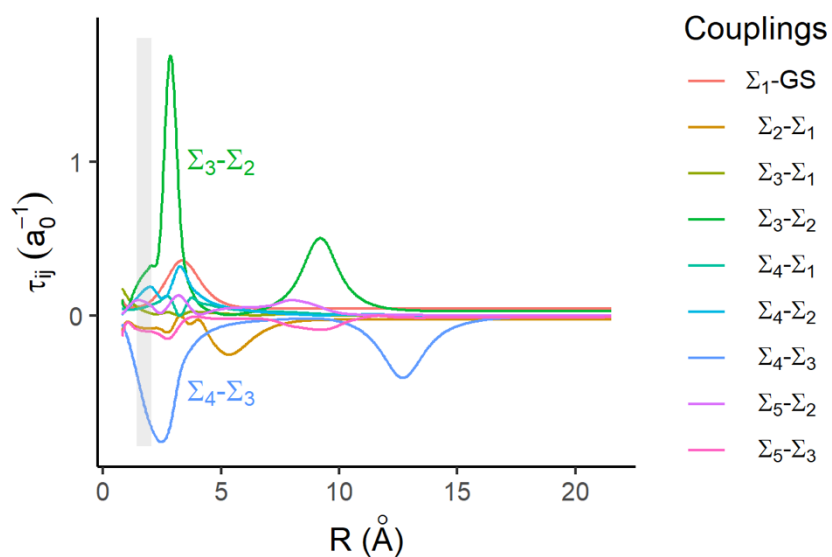

Figure S1 : Curves of the non adiabatic couplings, adapted from S. van den Wildenberg, B. Mignolet, R. D. Levine and F. Remacle, *J. Chem. Phys.*, 2019, **151**, 134310.

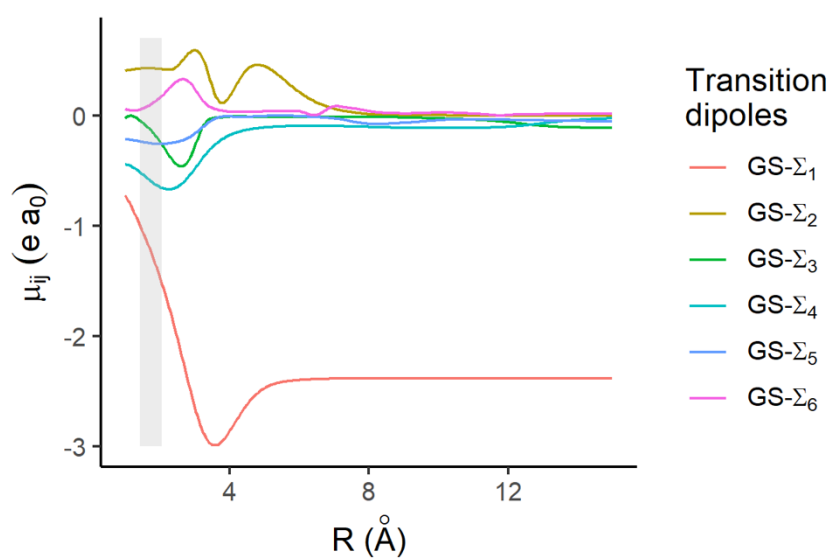

Figure S2 : Curves of the transition dipoles between the GS and the excited electronic states, adapted from S. van den Wildenberg, B. Mignolet, R. D. Levine and F. Remacle, *J. Chem. Phys.*, 2019, **151**, 134310.

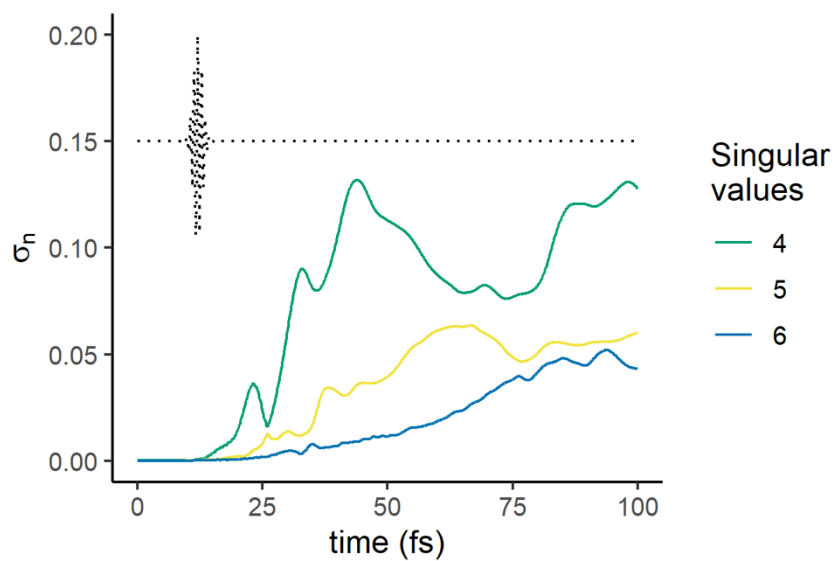

Figure S3. Zoom on the time dependence of the singular values  $\sigma_4$ ,  $\sigma_5$  and  $\sigma_6$ . The avoided crossings between  $\sigma_4$  and  $\sigma_5$  at 25 fs, and between  $\sigma_5$  and  $\sigma_6$  at 75 fs reflect the effect of the NAC coupling on the singular components. The weights of the electronic singular eigenvectors interchange in the regions of strong NAC.

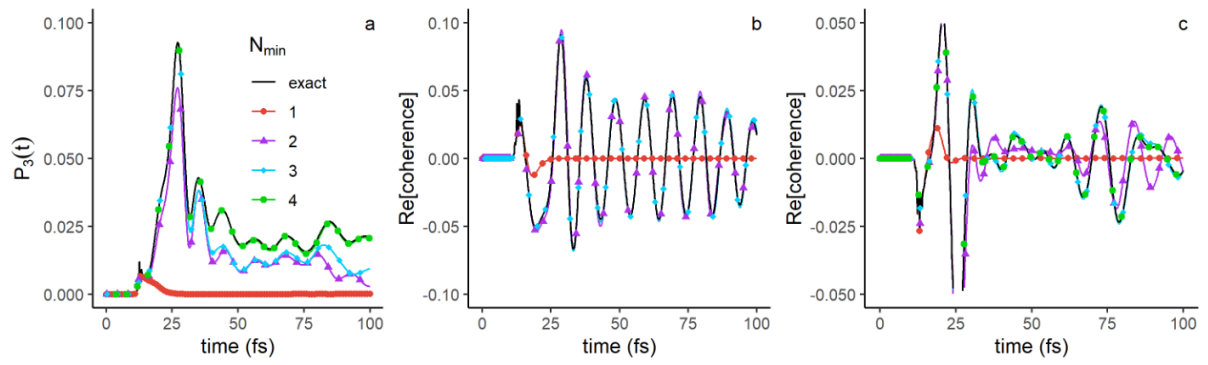

Figure S4. a) Recovered population of the  $\Sigma_3$  state as a function of the number,  $N_{\min}$ , of singular components included in Eq. (4). b) Recovered electronic coherence between the  $\Sigma_3$  and the  $\Sigma_4$  state. c) Recovered electronic coherence between  $\Sigma_3$  and  $\Sigma_2$ . The color code is given in the inset of panel a.
